# Supplementary material for: Microplastics removal in wastewater treatment plants: a critical review
Source: Royal Society of Chemistry journal article supplement (doi:10.1039/d0ew00397b), 2020-01-01
Supplement: d0ew00397b1.pdf [file d0ew00397b1.pdf]

### Electronic supplementary information

**Table ESI 1:** the size of spherical polymer particles predicted to have a settling/floating velocity of  $4.6 \times 10^{-4} \text{ m}\cdot\text{s}^{-1}$  (equivalent to an overflow velocity of  $40 \text{ m}^3/\text{m}^2\cdot\text{day}^{-1}$ ). Particles above this size are predicted to be removed by density-driven separation during primary sedimentation. See the manuscript for more details.

| Polymer                    | Density of solid<br>( $\text{kg}\cdot\text{m}^{-3}$ ) | Density of<br>water<br>( $\text{kg}\cdot\text{m}^{-3}$ ) | Dynamic<br>viscosity of<br>water<br>( $\text{kg}\cdot\text{m}^{-1}\cdot\text{s}^{-1}$ ) | Critical<br>particle<br>diameter<br>( $\mu\text{m}$ ) |
|----------------------------|-------------------------------------------------------|----------------------------------------------------------|-----------------------------------------------------------------------------------------|-------------------------------------------------------|
| Expanded polystyrene       | 25                                                    | 998.2                                                    | $1.002 \times 10^{-3}$                                                                  | 30                                                    |
| Low-density polyethylene   | 910                                                   | 998.2                                                    | $1.002 \times 10^{-3}$                                                                  | 98                                                    |
| High-density polyethylene  | 960                                                   | 998.2                                                    | $1.002 \times 10^{-3}$                                                                  | 149                                                   |
| Polypropylene              | 875                                                   | 998.2                                                    | $1.002 \times 10^{-3}$                                                                  | 83                                                    |
| Polystyrene                | 1070                                                  | 998.2                                                    | $1.002 \times 10^{-3}$                                                                  | 109                                                   |
| Polyethylene terephthalate | 1205                                                  | 998.2                                                    | $1.002 \times 10^{-3}$                                                                  | 64                                                    |
| Polyamide                  | 1090                                                  | 998.2                                                    | $1.002 \times 10^{-3}$                                                                  | 96                                                    |
| Polyvinylchloride          | 1370                                                  | 998.2                                                    | $1.002 \times 10^{-3}$                                                                  | 48                                                    |
| Acrylic                    | 1145                                                  | 998.2                                                    | $1.002 \times 10^{-3}$                                                                  | 76                                                    |
| Polycarbonate              | 1210                                                  | 998.2                                                    | $1.002 \times 10^{-3}$                                                                  | 63                                                    |
| Polyurethane               | 1200                                                  | 998.2                                                    | $1.002 \times 10^{-3}$                                                                  | 65                                                    |
| Alkyd                      | 1670                                                  | 998.2                                                    | $1.002 \times 10^{-3}$                                                                  | 36                                                    |
| Polyester                  | 1770                                                  | 998.2                                                    | $1.002 \times 10^{-3}$                                                                  | 33                                                    |
| Polyoximethylene           | 1510                                                  | 998.2                                                    | $1.002 \times 10^{-3}$                                                                  | 41                                                    |
| polyvinyl alcohol          | 1250                                                  | 998.2                                                    | $1.002 \times 10^{-3}$                                                                  | 58                                                    |
| Polytetrafluoroethylene    | 2200                                                  | 998.2                                                    | $1.002 \times 10^{-3}$                                                                  | 27                                                    |
